# Supplementary material
Source: bioRxiv or medRxiv preprint supplement (https://medrxiv.org/content/medrxiv/early/2022/06/22/2022.06.21.22276250/DC2/embed/media-2.pdf)

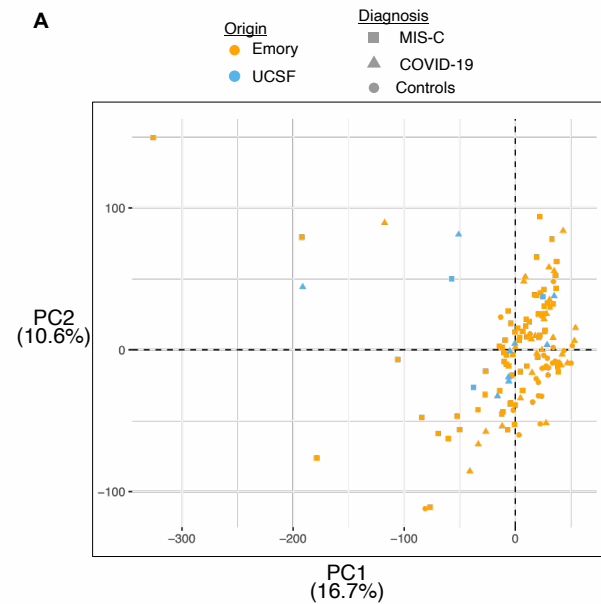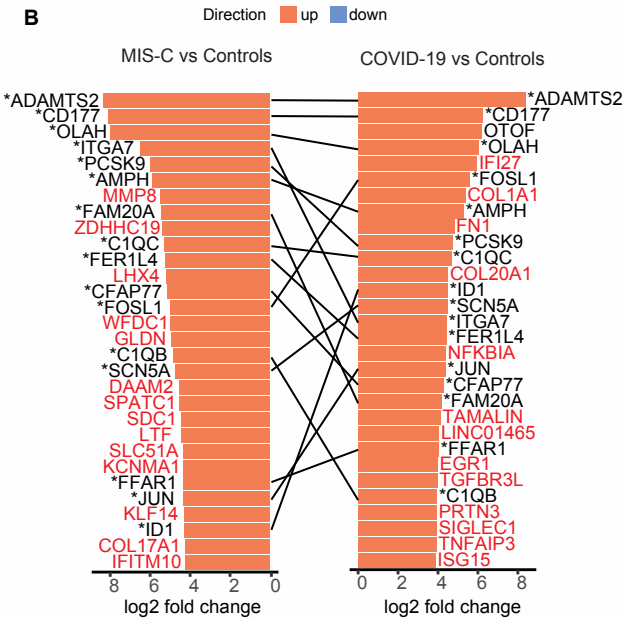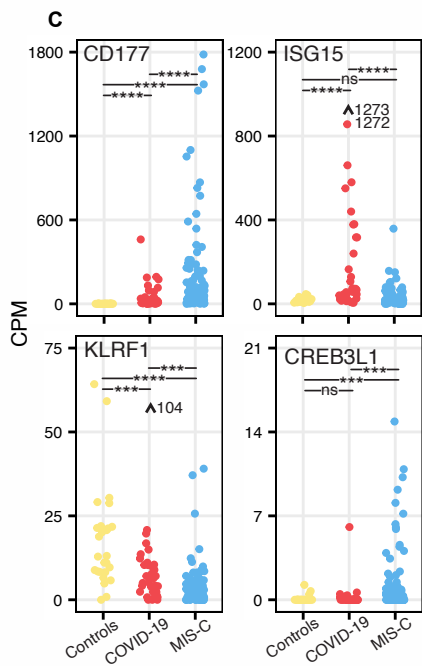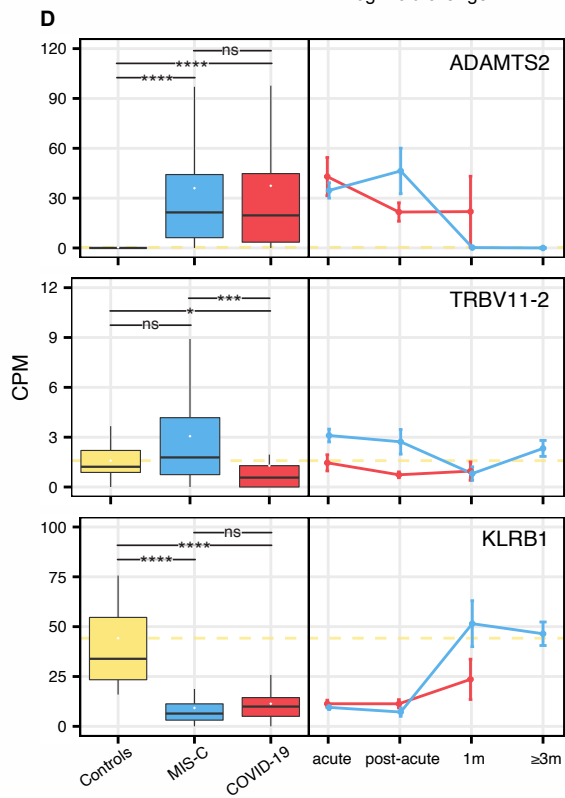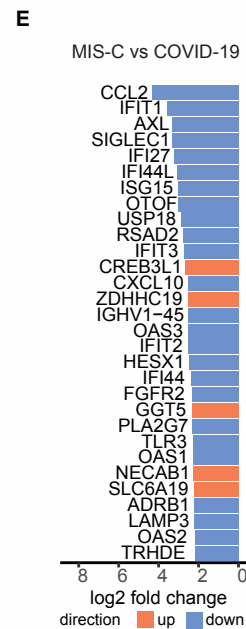

Supplement: Supplementary file [file media-2.pdf]
